# Supplementary material for: Exome‐wide association of deltamethrin resistance in Aedes aegypti from Mexico
Source: PubMed Central journal article supplement (PMC6766855; doi:10.1111/imb.12575), 2019-03-13

### Chromosome 1

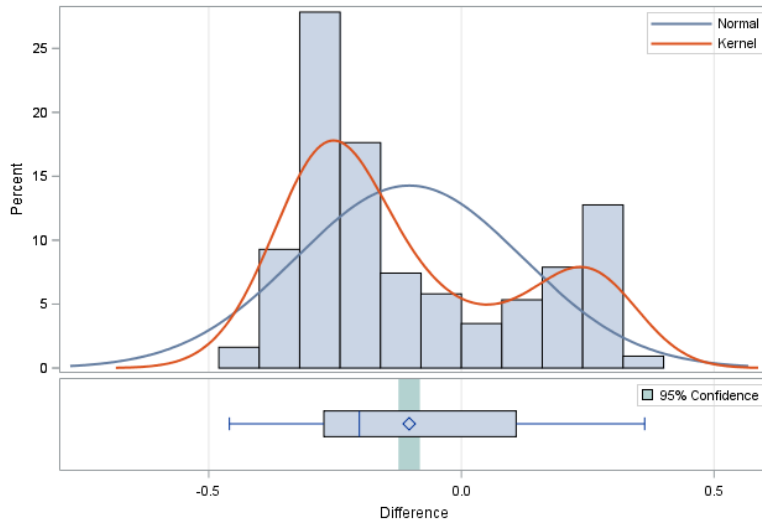

### Chromosome 2

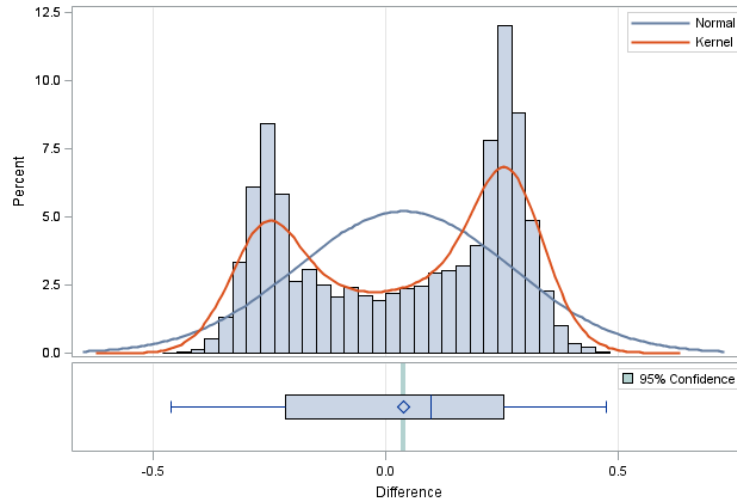

### Chromosome 3

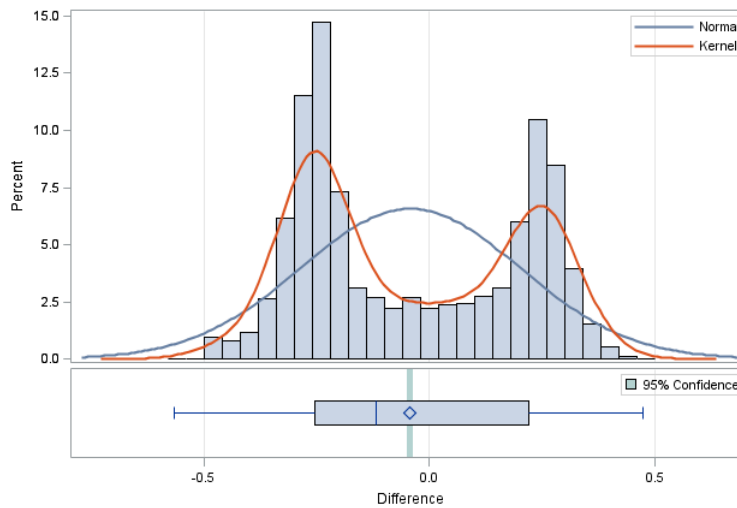

Supplement: IMB-28-591-s001.pdf [file IMB-28-591-s001.pdf]
