# Supplementary material for: Exome‐wide association of deltamethrin resistance in Aedes aegypti from Mexico
Source: Insect Mol Biol. 2019 Mar 13;28(5):591–604. doi: 10.1111/imb.12575 (PMC6766855; doi:10.1111/imb.12575)
Supplement: Supplementary file 3 — Figure S3. List of significant detoxification genes in our study and the expression that has been reported in previous studies. Upregulated genes are highlighted in orange, downregulated are highlighted in blue, downregulated or upregulated in the same study are highlighted in grey. A number represents the number of polymorphisms found at a particular SNP in that gene. [file IMB-28-591-s003.pdf]

[illegible]

|              |             |            |  |  |  |  |  |  |  |  |  |  |  |  |  |  |  |  |  |  |  |  |  |  |
|--------------|-------------|------------|--|--|--|--|--|--|--|--|--|--|--|--|--|--|--|--|--|--|--|--|--|--|
| CYP9M7       | LOC5569824  | AAEL001292 |  |  |  |  |  |  |  |  |  |  |  |  |  |  |  |  |  |  |  |  |  |  |
| CYP9M9       | LOC5572442  | AAEL001807 |  |  |  |  |  |  |  |  |  |  |  |  |  |  |  |  |  |  |  |  |  |  |
| GST          |             |            |  |  |  |  |  |  |  |  |  |  |  |  |  |  |  |  |  |  |  |  |  |  |
| GSTD2        | LOC5568355  | AAEL001078 |  |  |  |  |  |  |  |  |  |  |  |  |  |  |  |  |  |  |  |  |  |  |
| GSTX1        | LOC5563651  | AAEL000092 |  |  |  |  |  |  |  |  |  |  |  |  |  |  |  |  |  |  |  |  |  |  |
| GSTO1        | LOC23687506 | AAEL017085 |  |  |  |  |  |  |  |  |  |  |  |  |  |  |  |  |  |  |  |  |  |  |
| Redox        |             |            |  |  |  |  |  |  |  |  |  |  |  |  |  |  |  |  |  |  |  |  |  |  |
| HPX1         | LOC5567514  | AAEL006014 |  |  |  |  |  |  |  |  |  |  |  |  |  |  |  |  |  |  |  |  |  |  |
| HPX6         | LOC5575608  | AAEL011941 |  |  |  |  |  |  |  |  |  |  |  |  |  |  |  |  |  |  |  |  |  |  |
| HPX8C        | LOC5564685  | AAEL004386 |  |  |  |  |  |  |  |  |  |  |  |  |  |  |  |  |  |  |  |  |  |  |
| MNSOD2       | LOC5566004  | AAEL005108 |  |  |  |  |  |  |  |  |  |  |  |  |  |  |  |  |  |  |  |  |  |  |
| aldo-keto re | LOC5565865  | AAEL015002 |  |  |  |  |  |  |  |  |  |  |  |  |  |  |  |  |  |  |  |  |  |  |
| ALDOX 1037   | LOC5573297  | AAEL010370 |  |  |  |  |  |  |  |  |  |  |  |  |  |  |  |  |  |  |  |  |  |  |
| ALDOX 1038   | LOC5573275  | AAEL010380 |  |  |  |  |  |  |  |  |  |  |  |  |  |  |  |  |  |  |  |  |  |  |
| ALDOX 1038   | LOC5573295  | AAEL010384 |  |  |  |  |  |  |  |  |  |  |  |  |  |  |  |  |  |  |  |  |  |  |
| ALDOX 1036   | LOC5573281  | AAEL010367 |  |  |  |  |  |  |  |  |  |  |  |  |  |  |  |  |  |  |  |  |  |  |
| ALDOX 1037   | LOC5573298  | AAEL026787 |  |  |  |  |  |  |  |  |  |  |  |  |  |  |  |  |  |  |  |  |  |  |
| ALDOX 1038   | LOC5573296  | AAEL010382 |  |  |  |  |  |  |  |  |  |  |  |  |  |  |  |  |  |  |  |  |  |  |
| ALDOX 1039   | LOC5573283  | AAEL024680 |  |  |  |  |  |  |  |  |  |  |  |  |  |  |  |  |  |  |  |  |  |  |
| aldo-keto re | LOC5564125  | AAEL004086 |  |  |  |  |  |  |  |  |  |  |  |  |  |  |  |  |  |  |  |  |  |  |
| aldo-keto re | LOC5564134  | AAEL004088 |  |  |  |  |  |  |  |  |  |  |  |  |  |  |  |  |  |  |  |  |  |  |
| dihydrolipo  | LOC5568522  | AAEL006928 |  |  |  |  |  |  |  |  |  |  |  |  |  |  |  |  |  |  |  |  |  |  |
| DUOX         | LOC5569379  | AAEL007563 |  |  |  |  |  |  |  |  |  |  |  |  |  |  |  |  |  |  |  |  |  |  |

|    |      |         |
|----|------|---------|
| Up | Down | Up/Down |
|----|------|---------|

**Supplementary Table 6.** List of significant detoxification genes in our study and the expression that has been reported in previous studies. Upregulated genes are highlighted in orange, downregulated are highlighted in blue, downregulated or upregulated in the same study are highlighted in grey. If a numerical is shown, it represents the number of polymorphisms found at a particular SNP in that gene, sign= significantly associated with resistance.

<sup>1</sup>Poupardin et al 2008; <sup>2</sup>Saavedra-Rodriguez et al 2008; <sup>3</sup>Strode et al 2008; <sup>4</sup>Poupardin et al 2009; <sup>5</sup>Riaz et al 2009; <sup>6</sup>Marcombe et al 2009; <sup>7</sup>David et al 2010; <sup>8</sup>Saavedra-Rodriguez 2011; <sup>9</sup>Bingham et al 2011; <sup>10</sup>Bariami et al 2012; <sup>11</sup>Poupardin et al 2012; <sup>12</sup>Strode et al 2012; <sup>13</sup>Marcombe et al 2012; <sup>14</sup>Grisales et al 2013; <sup>15</sup>David et al 2014; <sup>16</sup>Saavedra-Rodriguez et al 2013; <sup>17</sup>Poupardin et al 2013; <sup>18</sup>Kasai et al 2014; <sup>19</sup>Reid et al 2014; <sup>20</sup>Dusofur et al 2015; <sup>21</sup>Faucon et al 2015; <sup>22</sup>Estep et al 2017.
